# Supplementary material
Source: PubMed Central journal article supplement (PMC9481652)

# Supplemental Figure 1

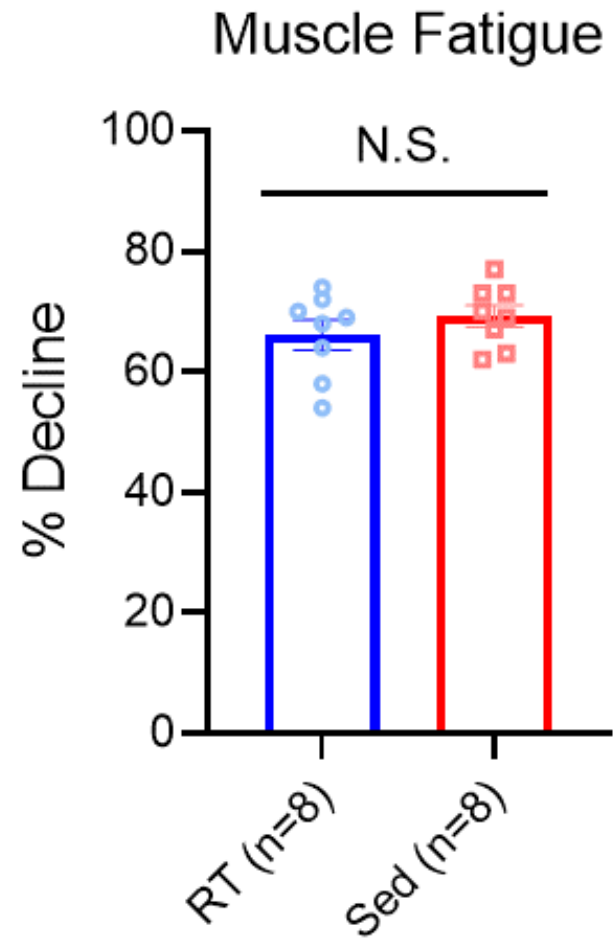

# Supplemental Figure 2

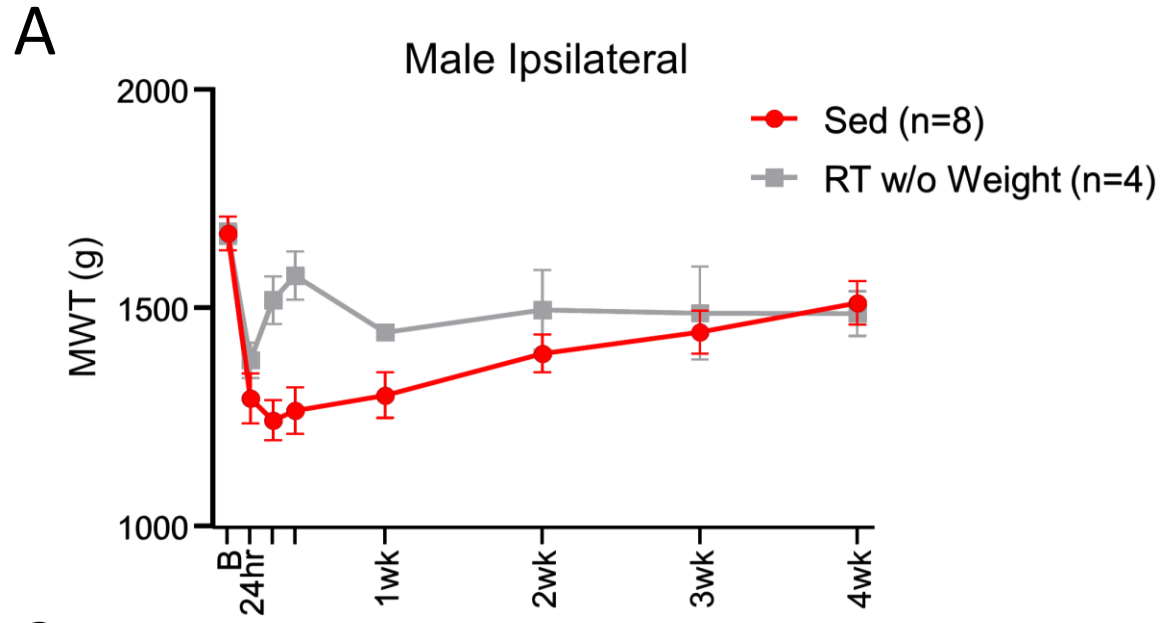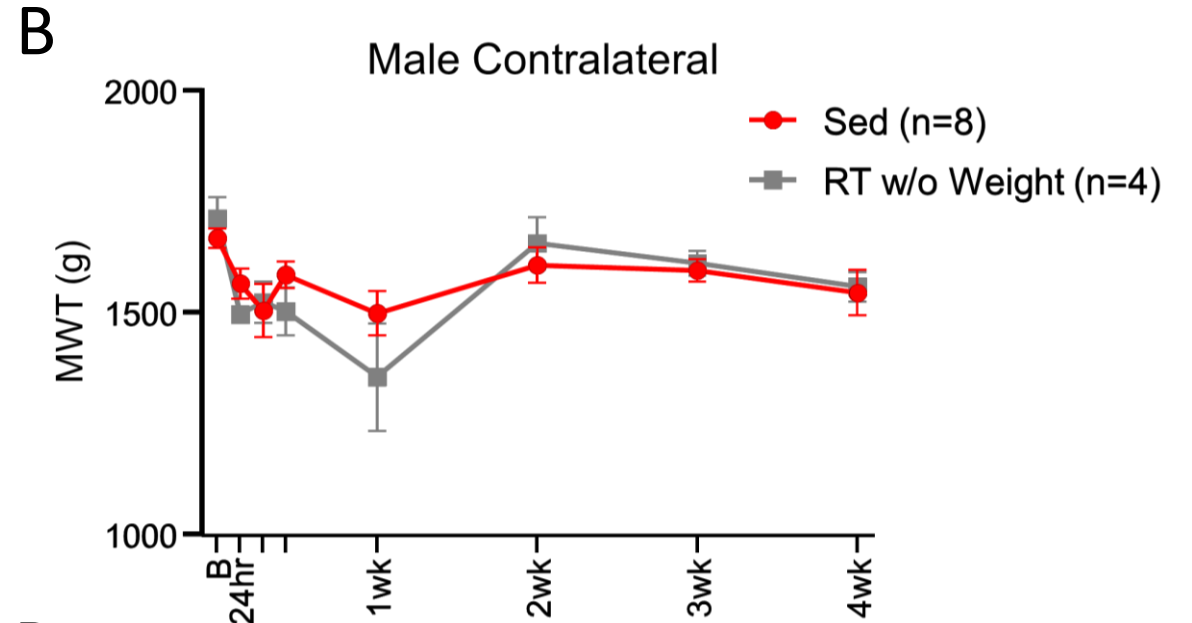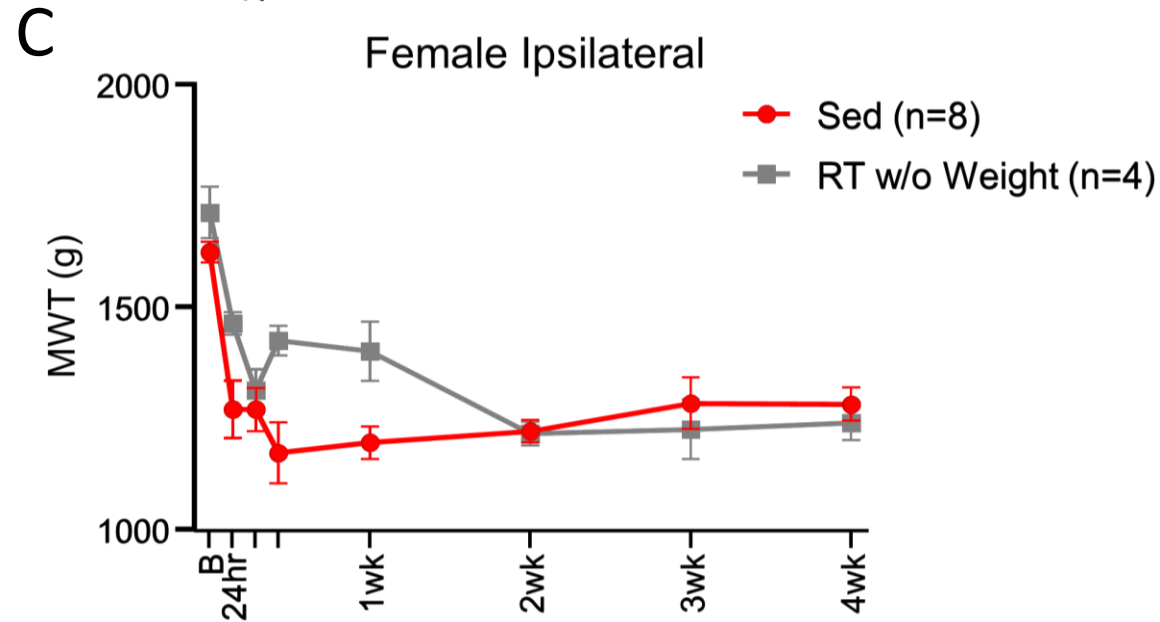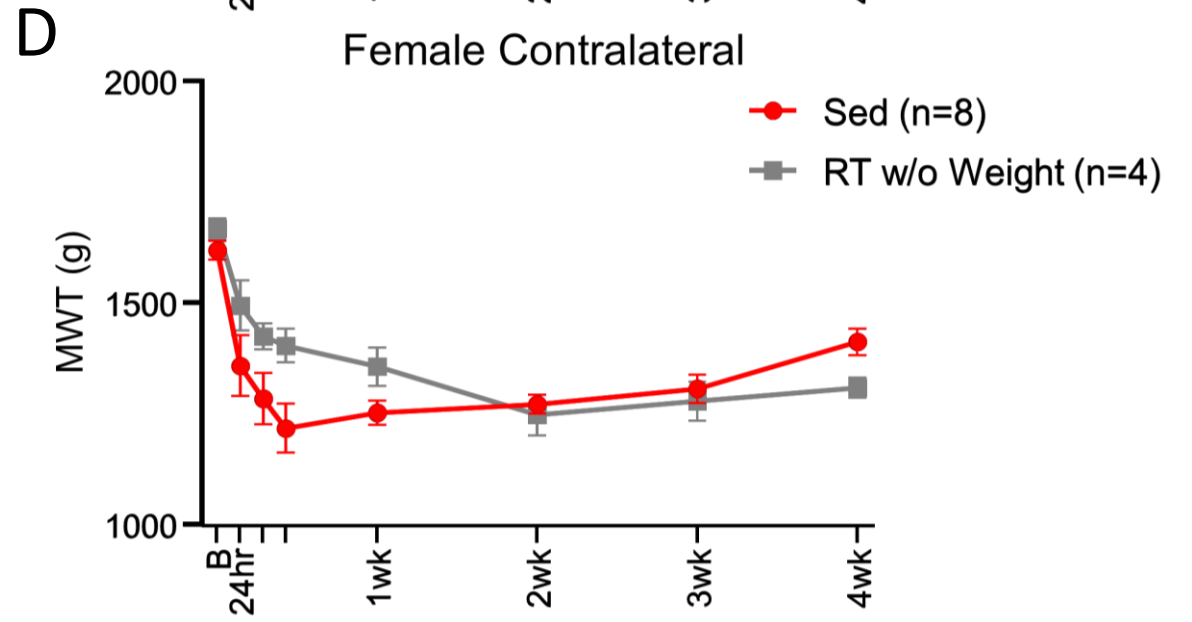

# Supplemental Figure 3

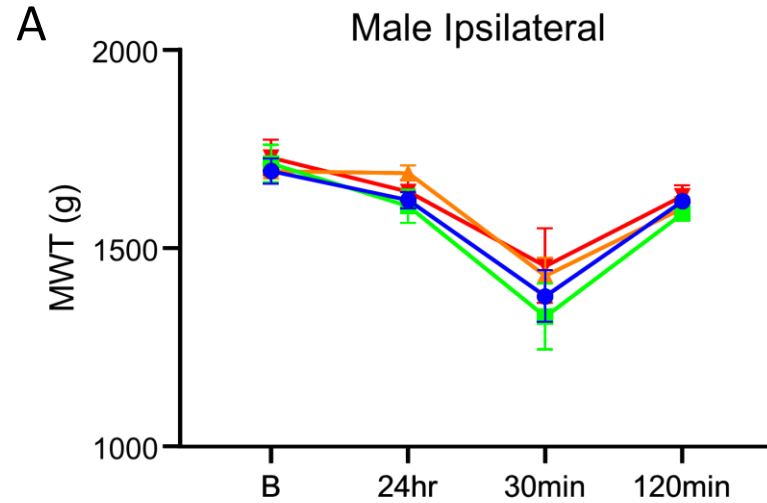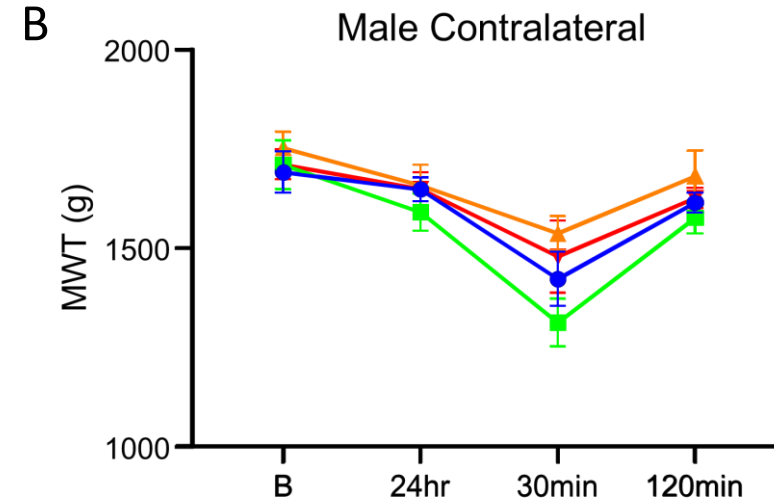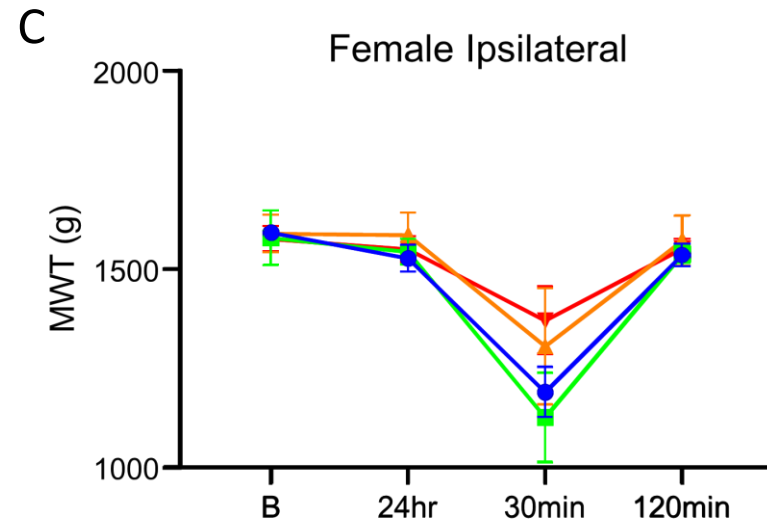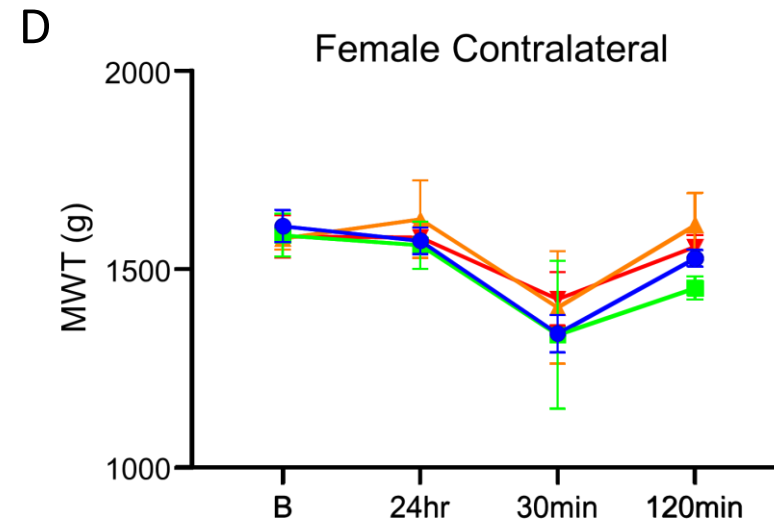

● Veh (n=6) ■ 1mg/kg (n=4) ▲ 3mg/kg (n=4) ▼ 10mg/kg (n=6)

Supplement: NIHMS1791019-supplement-Supplementary_Materials__figures__tables.pdf [file NIHMS1791019-supplement-Supplementary_Materials__figures__tables.pdf]
